# Supplementary material
Source: publisher site journal article supplement (https://www.dovepress.com/article/533619)
Supplement: Supplementary file 1 [file 533619.docx]

**Table S1** **Baseline characteristics and KAP Scores**

| **Variables** | **N (%)** | **Knowledge (mean ± SD)** | **P** | **Attitude (mean ± SD)** | **P** |
| --- | --- | --- | --- | --- | --- |

| ender |  |  | 0.107 |  | 0.704 |
| --- | --- | --- | --- | --- | --- |
| Male | 60 (11.950 | 7.57±1.31 |  | 102.87±20.27 |  |
| Female | 442 (88.05) | 7.57±1.07 |  | 105.65±18.67 |  |
| Age |  |  | 0.371 |  | 0.270 |
| 20-29 years | 207 (41.24) | 7.65±1.04 |  | 107.26±19.31 |  |
| 30-39 years | 226 (45.02) | 7.50±1.14 |  | 104.03±18.63 |  |
| 40 years and above | 69 (13.75) | 7.52±1.13 |  | 103.74±18.04 |  |
| Birthplace |  |  | 0.861 |  | 0.103 |
| Rural | 308 (61.35) | 7.61±1.07 |  | 103.62±18.67 |  |
| Urban | 194 (38.65) | 7.50±1.13 |  | 108.01±18.92 |  |
| Ethnicity |  |  | 0.170 |  | 0.759 |
| Han | 490 (97.61) | 7.57±1.10 |  | 105.12±18.77 |  |
| Other | 12 (2.39) | 7.25±0.87 |  | 113.58±21.87 |  |
| Religious beliefs |  |  | 0.799 |  | 0.042 |
| None | 482 (96.02) | 7.56±1.10 |  | 105.69±19.04 |  |
| Yes | 20 (3.98) | 7.60±1.10 |  | 96.35±11.13 |  |
| Only child |  |  | 0.851 |  | 0.035 |
| Yes | 181 (36.06) | 7.62±1.10 |  | 106.60±19.27 |  |
| No | 321 (63.94) | 7.53±1.10 |  | 104.60±18.63 |  |
| Marital status |  |  | 0.132 |  | 0.033 |
| Married | 329 (65.54) | 7.50±1.13 |  | 104.01±18.73 |  |
| Unmarried | 173 (34.46) | 7.70±1.02 |  | 107.82±18.93 |  |
| Have children |  |  | 0.066 |  | 0.073 |
| Yes | 292 (58.17) | 7.51±1.10 |  | 103.44±18.62 |  |
| No | 210 (41.83) | 7.64±1.09 |  | 107.93±18.95 |  |
| Education |  |  | 0.242 |  | 0.049 |
| Technical school | 12 (2.39) | 7.83±0.83 |  | 96.17±14.78 |  |
| College | 117 (23.31) | 7.59±1.19 |  | 105.59±18.82 |  |
| Bachelor’s degree and above | 373 (74.30) | 7.55±1.07 |  | 105.53±18.97 |  |
| Professional title |  |  | 0.946 |  | 0.599 |
| Junior | 351 (69.92) | 7.58±1.06 |  | 105.93±18.99 |  |
| Intermediate or senior | 151 (30.08) | 7.54±1.19 |  | 103.89±18.57 |  |
| Years of work |  |  | 0.246 |  | 0.236 |
| 1-2 years | 49 (9.76) | 7.37±1.11 |  | 105.67±18.45 |  |
| 3-5 years | 114 (22.71) | 7.71±1.00 |  | 108.54±19.48 |  |
| 6-9 years | 109 (21.71) | 7.61±1.16 |  | 102.03±19.67 |  |
| 10 years and above | 230 (45.82) | 7.52±1.10 |  | 105.21±18.10 |  |
| Subspecialty group in the operating room |  |  | 0.995 |  | 0.217 |
| General surgery | 193 (38.45) | 7.50±1.14 |  | 104.24±19.68 |  |
| Orthopedics | 107 (21.31) | 7.55±1.12 |  | 104.39±18.62 |  |
| Cardiothoracic surgery | 65 (12.95) | 7.82±0.92 |  | 108.58±19.29 |  |
| Neurosurgery | 35 (6.97) | 7.69±1.11 |  | 102.63±17.45 |  |
| Urology | 35 (6.97) | 7.54±1.22 |  | 105.94±16.45 |  |
| Ophthalmology and otorhinolaryngology | 44 (8.76) | 7.41±1.02 |  | 108.93±19.20 |  |
| Otolaryngology burns and plastic surgery | 14 (2.79) | 7.50±1.09 |  | 101.21±13.13 |  |
| Pediatrics Surgery | 9 (1.79) | 7.89±0.93 |  | 112.56±20.19 |  |
| Number of participations in public welfare activities annually |  |  | 0.618 |  | 0.019 |
| Less than 1 time | 300 (59.76) | 7.52±1.07 |  | 103.62±18.55 |  |
| 1-5 times | 194 (38.65) | 7.63±1.14 |  | 107.84±19.40 |  |
| More than 5 times | 8 (1.59) | 7.75±1.04 |  | 108.00±10.30 |  |
| Participated in voluntary blood donation |  |  | 0.582 |  | 0.934 |
| Yes | 269 (53.59) | 7.57±1.10 |  | 106.46±19.05 |  |
| No | 233 (46.41) | 7.56±1.10 |  | 104.00±18.61 |  |
| Participated in organ procurement surgery |  |  | 0.014 |  | 0.005 |
| Yes | 197 (39.24) | 7.78±1.06 |  | 108.48±18.63 |  |
| No | 305 (60.76) | 7.43±1.10 |  | 103.28±18.77 |  |
| Participated in organ transplant surgery |  |  | <0.001 |  | <0.001 |
| Yes | 223 (44.42) | 7.79±1.08 |  | 108.28±18.97 |  |
| No | 279 (55.58) | 7.39±1.08 |  | 102.95±18.49 |  |
| Self or relatives received organ donation |  |  | 0.931 |  | 0.193 |
| Yes | 32 (6.37) | 7.31±1.31 |  | 107.84±17.18 |  |
| No | 470 (96.63) | 7.58±1.08 |  | 105.15±18.98 |  |
| Self or relatives donated organs |  |  | 0.964 |  | 0.988 |
| Yes | 13 (2.59) | 7.31±1.18 |  | 97.85±23.88 |  |
| No | 489 (97.41) | 7.57±1.09 |  | 105.52±18.71 |  |
| Registered for organ donation |  |  | 0.799 |  | 0.106 |
| Yes | 20 (3.98) | 7.55±1.00 |  | 114.30±17.25 |  |
| No | 482 (96.02) | 7.57±1.10 |  | 104.95±18.86 |  |
| Awareness of ways to register for organ donation |  |  | 0.146 |  | 0.226 |
| Yes | 89 (17.73) | 7.56±1.25 |  | 109.04±18.26 |  |
| No | 413 (82.27) | 7.57±1.06 |  | 104.52±18.92 |  |
| Consider the ways to register for organ donation convenient |  |  |  |  |  |
| Yes | 68 (13.55) | 7.65±1.26 |  | 108.06±17.86 |  |
| No | 21 (4.18) | 7.29±1.23 |  | 112.24±19.59 |  |
| Awareness of the “regulations on human organ transplantation and donation” |  |  | 0.457 |  | 0.757 |
| Yes | 59 (11.75) | 7.36±1.27 |  | 107.54±19.93 |  |
| No | 443 (88.25) | 7.59±1.07 |  | 105.02±18.73 |  |
| Discussed organ donation with family members |  |  | 0.946 |  | <0.001 |
| Yes | 151 (30.08) | 7.60±1.05 |  | 114.32±17.24 |  |
| No | 351 (69.92) | 7.55±1.11 |  | 101.44±18.23 |  |
| Family members’ attitude towards organ donation |  |  | 0.705 |  | <0.001 |
| Strongly agree | 31 (6.18) | 7.42±1.09 |  | 116.29±21.09 |  |
| Agree | 88 (17.53) | 7.47±1.13 |  | 113.53±19.41 |  |
| Neutral | 315 (62.75) | 7.62±1.09 |  | 104.59±16.65 |  |
| Disagree | 58 (11.55) | 7.59±1.09 |  | 93.84±19.15 |  |
| Strongly disagree | 10 (1.99) | 7.00±0.94 |  | 88.50±21.17 |  |
| Reasons for family opposition (multiple choices) |  |  |  |  |  |
| Traditional and outdated beliefs | 52 (10.36) |  |  |  |  |
| Lack of understanding about organ donation | 40 (7.97) |  |  |  |  |
| Concerns about physical harm | 25 (4.98) |  |  |  |  |
| Inadequate legal regulations on donation | 19 (3.78) |  |  |  |  |
| Complicated donation procedures | 12 (2.39) |  |  |  |  |
| Lack of a reasonable compensation mechanism | 18 (3.59) |  |  |  |  |
| High surgical costs | 12 (2.39) |  |  |  |  |
| Other | 14 (2.79) |  |  |  |  |
| Experienced persuasion for donation |  |  | 0.591 |  | 0.205 |
| Yes | 34 (6.77) | 7.18±1.24 |  | 108.56±16.96 |  |
| No | 468 (93.23) | 7.59±1.08 |  | 105.08±18.99 |  |
| Promoted or advocated for organ donation |  |  | 0.636 |  | 0.002 |
| Yes | 76 (15.14) | 7.41±1.28 |  | 112.33±16.90 |  |
| No | 426 (84.86) | 7.59±1.06 |  | 104.07±18.95 |  |

**Table S2. Knowledge dimension response**

| **Items, n (%)** | **Correct response** |
| --- | --- |
| 1. Brain death refers to a patient's inability to breathe independently, and the heart cannot beat. | 357 (71.12) |
| 2. Any physician can determine brain death. | 472 (94.02) |
| 3. Organ transplantation surgery can be performed at any time after a person's death. | 497 (99.00) |
| 4. People with any illness can donate organs. | 491 (97.81) |
| 5. People of any age can donate organs. | 353 (70.32) |
| 6. If the deceased expressed a written willingness to donate during their lifetime, physicians can remove organs. | 82 (16.33) |
| 7. Organs cannot be removed unless the deceased had agreed in writing during their lifetime. | 253 (50.40) |
| 8. Organ removal surgery must be performed after determining brain death. | 445 (88.65) |
| 9. Organ donors cannot request any monetary compensation. | 431 (85.86) |
| 10. The cost of organ removal surgery must be borne by the donor. | 417 (83.07) |

**Table S3. Attitude dimension response**

| **Item, n (%)** | **Strongly agree** | **Agree** | **Slightly agree** | **Neutral** | **Slightly disagree** | **Disagree** | **Strongly disagree** |
| --- | --- | --- | --- | --- | --- | --- | --- |
| 1. I believe organ donation can save many lives. | 311(61.95) | 137(27.29) | 23(4.58) | 28(5.58) | / | 1(0.2) | 2(0.4) |
| 2. Having seen or heard reports on this, I think donating organs after death can benefit the public. | 258 (51.39) | 148(29.48) | 42(8.37) | 49 (9.76) | 3(0.6) | / | 2(0.4) |
| 3. If I could donate my organs after death, it would be like having a part of me still alive. | 159 (31.67) | 114(22.71) | 79(15.74) | 116(23.11) | 16(3.19) | 8(1.59) | 10(1.99) |
| 4. If someone could lead a normal life because of receiving my donated organs, that would be wonderful. | 262(52.19) | 126(25.1) | 52(10.36) | 59(11.75) | 1(0.2) | / | 2(0.4) |
| 5. I believe the human body is just a temporary home for the soul and thoughts; why not donate the body after death. | 136 (27.09) | 103(20.52) | 76(15.14) | 142(28.29) | 19(3.78) | 13(2.59) | 13(2.59) |
| 6. Organ donation does not contradict my values or religious beliefs. | 183(36.45) | 132 (26.29) | 68 (13.55) | 104 (20.72) | 5(1) | 5(1) | 5(1) |
| 7. Although organ donation can save lives, the effect is not very good. | 24 (4.78) | 37 (7.37) | 82 (16.33) | 209 (41.63) | 68(13.55) | 56(11.16) | 26(5.18) |
| 8. I cannot be sure that my donated organs will be transplanted into someone who needs them. | 49(9.8) | 69(13.7) | 95(18.9) | 176 (35.1) | 51(10.2) | 33(6.6) | 29(5.8) |
| 9. Even if I donate my organs, others may not be suitable. | 29(5.78) | 57(11.35) | 99 (19.72) | 169 (33.67) | 88(17.53) | 33(6.57) | 27(5.38) |
| 10. I am afraid that my organs will be transplanted into bad people and harm society. | 44 (8.8) | 65 (12.9) | 74(14.7) | 200(39.8) | 69(13.7) | 24(4.8) | 26(5.2) |
| 11. I feel that, given my age or current physical condition, I am not suitable for posthumous organ donation. | 30 (5.98) | 33 (6.57) | 39(7.77) | 211 (42.03) | 89 (17.73) | 61(12.15) | 39(7.77) |
| 12. If I promise to donate organs, I think my body will not be respected. | 16 (3.2) | 21 (4.2) | 31 (6.2) | 141 (28.1) | 101 (20.1) | 114 (22.7) | 78(15.5) |
| 13. I do not like the idea of my body being cut open after death. | 34(6.77) | 52 (10.36) | 61(12.15) | 189(37.65) | 60(11.95) | 63(12.55) | 43(8.57) |
| 14. If I promise to donate organs, before confirming my death, doctors will be eager to remove my organs. | 12 (2.39) | 16 (3.19) | 24 (4.78) | 114(22.71) | 73 (14.54) | 109(21.71) | 154(30.68) |
| 15. I do not like to think about death-related matters. | 94 (18.73) | 89 (17.73) | 54 (10.76) | 184 (36.65) | 38 (7.57) | 26 (5.18) | 17 (3.39) |
| 16. I feel that signing an organ donation consent form is an ominous thing, a bit like signing my own death certificate. | 30 (5.98) | 34 (6.77) | 33 (6.57) | 162(32.27) | 101(20.12) | 74(14.74) | 68(13.55) |
| 17. If I donate organs after death, I may not have a traditional funeral. | 18 (3.59) | 23 (4.58) | 30 (5.98) | 149 (29.68) | 108 (21.51) | 89 (17.73) | 85 (16.93) |
| 18. My religious beliefs dictate that after death, the body must remain intact. | 23 (4.6) | 21 (4.2) | 31 (6.2) | 184 (36.7) | 75 (14.9) | 67 (13.3) | 101 (20.1) |
| 19. If I am going to die, I must die at home; how could I donate organs after death. | 10 (1.99) | 12 (2.39) | 26 (5.18) | 154 (30.68) | 104 (20.72) | 95 (18.92) | 101 (20.12) |
| 20. Donating organs is against the natural order of things. | 9 (1.79) | 7 (1.39) | 25 (4.98) | 136 (27.09) | 107 (21.31) | 114 (22.71) | 104 (20.72) |
| 21. If my family knew that I donated organs after death, they would be unhappy. | 29 (5.78) | 37 (7.37) | 61 (12.15) | 228 (45.42) | 80 (15.94) | 34 (6.77) | 33 (6.57) |
| 22. I am afraid of being found to have certain diseases because of organ donation. | 11 (2.19) | 16 (3.19) | 42 (8.37) | 174 (34.66) | 106 (21.12) | 76 (15.14) | 77 (15.34) |

**Table S4. Willingness dimension response**

|  | **Not willing** | **Considered but undecided** | **Willing and discussed with family** | **Willing but not signed consent card** | **Willing and signed consent card** |
| --- | --- | --- | --- | --- | --- |
| 1. Are you willing to donate organs? | 81 (16.14) | 249 (49.6) | 94 (18.73) | 64 (12.75) | 14 (2.79) |
|  | Will | Will not | Do not know |  |  |
| 2. When a family member's life cannot be saved, would you sign a consent form to donate their organs? | 140 (27.89) | 91 (18.13) | 271 (53.98) |  |  |
|  | N (%) |  |  |  |  |
| 3. What organs would you be willing to donate? (Multiple choices allowed) |  |  |  |  |  |
| Cornea | 184 (36.65) |  |  |  |  |
| Whole body | 76 (15.14) |  |  |  |  |
| Heart | 107 (21.31) |  |  |  |  |
| Kidney | 113 (22.51) |  |  |  |  |
| Liver | 110 (21.91) |  |  |  |  |
| Lung | 86 (17.13) |  |  |  |  |
| Pancreas | 58 (11.55) |  |  |  |  |
| Bone | 49 (9.76) |  |  |  |  |
| Skin | 43 (8.57) |  |  |  |  |
| Not yet considered | 204 (40.64) |  |  |  |  |
| 4. To whom would you be willing to donate? (Multiple choices allowed) |  |  |  |  |  |
| Family | 386 (76.89) |  |  |  |  |
| Friends | 313 (62.35) |  |  |  |  |
| Colleagues | 279 (55.58) |  |  |  |  |
| Unknown individuals | 283 (56.37) |  |  |  |  |
| 5. Whose opinions would you consider when signing an organ donation card? (Multiple choices allowed) |  |  |  |  |  |
| Self | 306 (60.96) |  |  |  |  |
| Family | 369 (73.51) |  |  |  |  |
| Friends | 72 (14.34) |  |  |  |  |
| Other | 38 (7.57) |  |  |  |  |

**Table S5 Univariate logistic regression for knowledge**

| **Knowledge（cutoff=7）** | **Univariate logistic regression** | |
| --- | --- | --- |
| **OR (95%CI)** | **P** |
| Gender |  |  |
| Male | 1.195 (0.690-2.070) | 0.525 |
| Female | ref |  |
| Age |  |  |
| 20-29 years | 1.240 (0.717-2.142) | 0.441 |
| 30-39 years | 1.176 (0.685-2.019) | 0.557 |
| 40 years and above | ref |  |
| Birthplace |  |  |
| Rural | ref |  |
| Urban | 0.935 (0.651-1.342) | 0.715 |
| Religious beliefs |  |  |
| None | ref |  |
| Yes | 1.178 (0.473-2.933) | 0.725 |
| Only child |  |  |
| Yes | 1.495 (1.030-2.168) | 0.034 |
| No | ref |  |
| Marital status |  |  |
| Married | 0.811 (0.558-1.178) | 0.271 |
| Unmarried | ref |  |
| Have children |  |  |
| Yes | 0.904 (0.632-1.293) | 0.580 |
| No | ref |  |
| Education |  |  |
| Technical school | ref |  |
| College | 0.893 (0.268-2.977) | 0.854 |
| Bachelor’s degree and above | 0.920 (0.287-2.952) | 0.889 |
| Professional title |  |  |
| Junior | ref |  |
| Intermediate or senior | 0.969 (0.660-1.423) | 0.871 |
| Years of work |  |  |
| 1-2 years | ref |  |
| 3-5 years | 1.814 (0.923-3.567) | 0.084 |
| 6-9 years | 1.619 (0.821-3.191) | 0.164 |
| 10 years and above | 1.595 (0.858-2.967) | 0.140 |
| Number of participations in public welfare activities annually |  |  |
| Less than 1 time | ref |  |
| 1-5 times | 1.426 (0.988-2.059) | 0.058 |
| More than 5 times | 1.498 (0.352-6.380) | 0.585 |
| Participated in voluntary blood donation |  |  |
| Yes | 0.904 (0.634-1.287) | 0.575 |
| No | ref |  |
| Participated in organ procurement surgery |  |  |
| Yes | 2.024 (1.396-2.935) | <0.001 |
| No | ref |  |
| Participated in organ transplant surgery |  |  |
| Yes | 2.288 (1.588-3.297) | <0.001 |
| No | ref |  |
| Self or relatives received organ donation |  |  |
| Yes | 0.767 (0.375-1.570) | 0.468 |
| No | ref |  |
| Self or relatives donated organs |  |  |
| Yes | 0.661 (0.219-1.997) | 0.464 |
| No | ref |  |
| Registered for organ donation |  |  |
| Yes | 0.772 (0.316-1.889) | 0.571 |
| No | ref |  |
| Awareness of ways to register for organ donation |  |  |
| Yes | 1.057 (0.666-1.680) | 0.813 |
| No | ref |  |
| Awareness of the “regulations on human organ transplantation and donation” |  |  |
| Yes | 0.847 (0.491-1.460) | 0.550 |
| No | ref |  |
| Discussed organ donation with family members |  |  |
| Yes | 1.087 (0.740-1.599) | 0.670 |
| No | ref |  |
| Experienced persuasion for donation |  |  |
| Yes | 0.522 (0.258-1.059) | 0.072 |
| No | ref |  |
| Promoted or advocated for organ donation |  |  |
| Yes | 0.746 (0.457-1.216) | 0.240 |
| No | ref |  |

**Table S6 Univariate logistic regression for attitude**

| **Attitude（cutoff=107.8）** | **Univariate logistic regression** | |
| --- | --- | --- |
| **OR (95%CI)** | **P** |
| Knowledge total score | 1.009 (0.859-1.185) | 0.917 |
| Gender |  |  |
| Male | 0.942 (0.547-1.623) | 0.831 |
| Female | ref |  |
| Age |  |  |
| 20-29 years | 1.366 (0.788-2.368) | 0.267 |
| 30-39 years | 0.947 (0.548-1.636) | 0.845 |
| 40 years and above | ref |  |
| Birthplace |  |  |
| Rural | ref |  |
| Urban | 1.378 (0.960-1.977) | 0.082 |
| Religious beliefs |  |  |
| None | ref |  |
| Yes | 0.400 (0.143-1.119) | 0.081 |
| Only child |  |  |
| Yes | 1.333 (0.924-1.922) | 0.124 |
| No | ref |  |
| Marital status |  |  |
| Married | 0.657 (0.454-0.951) | 0.026 |
| Unmarried | ref |  |
| Have children |  |  |
| Yes | 0.665 (0.465-0.951) | 0.026 |
| No | ref |  |
| Education |  |  |
| Technical school | ref |  |
| College | 4.590 (0.964-21.864) | 0.056 |
| Bachelor’s degree and above | 4.010 (0.867-18.552) | 0.076 |
| Professional title |  |  |
| Junior | ref |  |
| Intermediate or senior | 0.845 (0.575-1.242) | 0.392 |
| Years of work |  |  |
| 1-2 years | ref |  |
| 3-5 years | 1.256 (0.642-2.456) | 0.505 |
| 6-9 years | 0.682 (0.345-1.348) | 0.271 |
| 10 years and above | 0.870 (0.468-1.614) | 0.658 |
| Number of participations in public welfare activities annually |  |  |
| Less than 1 time | ref |  |
| 1-5 times | 1.459 (1.014-2.099) | 0.042 |
| More than 5 times | 2.432 (0.571-10.364) | 0.230 |
| Participated in voluntary blood donation |  |  |
| Yes | 1.032 (0.725-1.469) | 0.862 |
| No | ref |  |
| Participated in organ procurement surgery |  |  |
| Yes | 1.666 (1.161-2.392) | 0.006 |
| No | ref |  |
| Participated in organ transplant surgery |  |  |
| Yes | 1.960 (1.370-2.804) | <0.001 |
| No | ref |  |
| Self or relatives received organ donation |  |  |
| Yes | 1.648 (0.801-3.391) | 0.175 |
| No | ref |  |
| Self or relatives donated organs |  |  |
| Yes | 1.066 (0.353-3.217) | 0.910 |
| No | ref |  |
| Registered for organ donation |  |  |
| Yes | 1.910 (0.767-4.758) | 0.164 |
| No | ref |  |
| Awareness of ways to register for organ donation |  |  |
| Yes | 1.337 (0.845-2.115) | 0.215 |
| No | ref |  |
| Awareness of the “regulations on human organ transplantation and donation” |  |  |
| Yes | 1.054 (0.611-1.818) | 0.851 |
| No | ref |  |
| Discussed organ donation with family members |  |  |
| Yes | 3.168 (2.129-4.715) | <0.001 |
| No | ref |  |
| Experienced persuasion for donation |  |  |
| Yes | 1.625 (0.806-3.276) | 0.175 |
| No | ref |  |
| Promoted or advocated for organ donation |  |  |
| Yes | 2.785 (1.670-4.646) | <0.001 |
| No | ref |  |

**Table S7 Univariate logistic regression for donate willingness**

| **Willingness（cutoff=2）** | **Univariate logistic regression** | |
| --- | --- | --- |
| **OR (95%CI)** | **P** |
| Knowledge total score | 1.075 (0.907-1.274) | 0.405 |
| Attitude total score | 1.046 (1.034-1.058) | <0.001 |
| Gender |  |  |
| Male | 0.954 (0.539-1.689) | 0.872 |
| Female | ref |  |
| Age |  |  |
| 20-29 years | 2.003 (1.071-3.745) | 0.030 |
| 30-39 years | 1.746 (0.937-3.254) | 0.079 |
| 40 years and above | ref |  |
| Birthplace |  |  |
| Rural | ref |  |
| Urban | 1.228 (0.842-1.789) | 0.286 |
| Religious beliefs |  |  |
| None | ref |  |
| Yes | 0.629 (0.225-1.760) | 0.377 |
| Only child |  |  |
| Yes | 1.209 (0.826-1.770) | 0.329 |
| No | ref |  |
| Marital status |  |  |
| Married | 0.714 (0.486-1.047) | 0.085 |
| Unmarried | ref |  |
| Have children |  |  |
| Yes | 0.647 (0.446-0.939) | 0.022 |
| No | ref |  |
| Education |  |  |
| Technical school | ref |  |
| College | 1.618 (0.415-6.310) | 0.488 |
| Bachelor’s degree and above | 1.567 (0.417-5.891) | 0.506 |
| Professional title |  |  |
| Junior | ref |  |
| Intermediate or senior | 0.969 (0.648-1.450) | 0.880 |
| Years of work |  |  |
| 1-2 years | ref |  |
| 3-5 years | 0.693 (0.349-1.376) | 0.295 |
| 6-9 years | 0.685 (0.343-1.367) | 0.283 |
| 10 years and above | 0.645 (0.344-1.211) | 0.172 |
| Number of participations in public welfare activities annually |  |  |
| Less than 1 time | ref |  |
| 1-5 times | 1.310 (0.898-1.912) | 0.161 |
| More than 5 times | 0.708 (0.140-3.574) | 0.676 |
| Participated in voluntary blood donation |  |  |
| Yes | 1.645 (1.130-2.395) | 0.009 |
| No | ref |  |
| Participated in organ procurement surgery |  |  |
| Yes | 1.057 (0.725-1.541) | 0.772 |
| No | ref |  |
| Participated in organ transplant surgery |  |  |
| Yes | 0.986 (0.680-1.428) | 0.939 |
| No | ref |  |
| Self or relatives received organ donation |  |  |
| Yes | 2.013 (0.981-4.131) | 0.057 |
| No | ref |  |
| Self or relatives donated organs |  |  |
| Yes | 3.171 (1.021-9.845) | 0.046 |
| No | ref |  |
| Registered for organ donation |  |  |
| Yes | 11.955 (3.452-41.401) | <0.001 |
| No | ref |  |
| Awareness of ways to register for organ donation |  |  |
| Yes | 1.551 (0.972-2.477) | 0.066 |
| No | ref |  |
| Awareness of the “regulations on human organ transplantation and donation” |  |  |
| Yes | 2.193 (1.268-3.793) | 0.005 |
| No | ref |  |
| Discussed organ donation with family members |  |  |
| Yes | 4.840 (3.217-7.281) | <0.001 |
| No | ref |  |
| Experienced persuasion for donation |  |  |
| Yes | 2.608 (1.290-5.272) | 0.008 |
| No | ref |  |
| Promoted or advocated for organ donation |  |  |
| Yes | 3.000 (1.822-4.939) | <0.001 |
| No | ref |  |
